# 1 **Comparison of CRISPR/Cas9-mediated megabase-scale genome deletion**

## 2 **methods in mouse embryonic stem cells**

3  
4 Masayuki Miyata, Junko Yoshida, Itsuki Takagishi, and Kyoji Horie\*

5  
6 Department of Physiology II, Nara Medical University, Kashihara, Nara 634-8521,

7 Japan

8  
9 \*Correspondence: [k-horie@naramed-u.ac.jp](mailto:k-horie@naramed-u.ac.jp) (K.H.)

10  
11 Running title: Comparison of CRISPR-mediated megabase-scale genome deletion

12 methods

### 13 14 **SUMMARY**

15 The genome contains large functional units ranging in size from hundreds of kilobases  
16 to megabases, such as gene clusters, promoter-enhancer loops, and topologically  
17 associating domains. To analyze these large functional units, the technique of deleting  
18 the entire functional unit is effective. However, deletion of such large regions is less  
19 efficient than conventional genome editing, especially in cultured cells, and a method  
20 that can ensure success is anticipated. Here, we compared methods to delete the  
21 2.5-Mb Krüppel-associated box zinc finger protein (KRAB-ZFP) gene cluster on  
22 chromosome 4 in mouse embryonic stem cells using CRISPR/Cas9. Three methods  
23 were used: first, deletion by non-homologous end joining (NHEJ); second,

24 homology-directed repair (HDR) using a single-stranded oligodeoxynucleotide  
25 (ssODN) with 70-bp homology arms; and third, HDR employing targeting vectors  
26 with a selectable marker and 1-kb homology arms. NHEJ-mediated deletion was  
27 achieved in 9% of the transfected cells. The deletion frequency of NHEJ and HDR  
28 was found to be comparable when the ssODN was transfected. Deletion frequency  
29 was highest when targeting vectors were introduced, with deletions occurring in  
30 31–63% of the drug-resistant clones. Biallelic deletion was observed when targeting  
31 vectors were used. This study will serve as a benchmark for the introduction of large  
32 deletions into the genome.

33

## 34 INTRODUCTION

35 Recent progress in genome science has revealed large functional units in the  
36 genome— such as gene clusters, promoter-enhancer loops, and topologically  
37 associating domains—which range from several hundred kilobases to megabases in  
38 length (Merkenschlager & Nora, 2016). Dysregulation of these functional units can  
39 lead to human diseases (Hnisz *et al*, 2016). To understand the genome from the  
40 perspective of such large functional units, technologies that can reliably modify large  
41 genomic regions are required. For this purpose, megabase-scale genome modifications  
42 using CRISPR/Cas9 have been reported by either microinjection of Cas9 and gRNAs  
43 into zygotes (Boroviak *et al*, 2016; Kato *et al*, 2017; Korablev *et al*, 2017; Mizuno *et*  
44 *al*, 2015) or by transfection of cultured cells (Eleveld *et al*, 2021; Essletzbichler *et al*,  
45 2014; Wolf *et al*, 2020). However, the efficiency of megabase-genome modification is  
46 inferior in cultured cells compared to zygote microinjection. Biallelic megabase-scale

47 deletion is even more challenging in cultured cells but is unquestionably required to  
48 conduct phenotype analysis in cultured cells. Genome modification in cultured cells is  
49 particularly important in the study of human biology and diseases. This is because  
50 zygote microinjection to create genetically modified living organisms is ethically  
51 prohibited in humans; hence, cultured cells must be used for analysis. Therefore, we  
52 anticipate the establishment of an efficient protocol for megabase-scale genome  
53 modifications in cultured cells.

54 The distal region of mouse chromosome 4 contains a 2.5-Mb region within  
55 which a gene cluster of Krüppel-associated box zinc finger protein (KRAB-ZFP)  
56 genes resides (Wolf *et al.*, 2020). KRAB-ZFP genes are known to be transcriptional  
57 repressors of retrotransposons (Ecco *et al.*, 2017). The retrotransposons and  
58 KRAB-ZFP genes have diversified in both nucleotide sequence and copy number as a  
59 result of their arms race. The diversified KRAB-ZFP genes also function as regulators  
60 of endogenous genes (Ecco *et al.*, 2017). We considered the deletion of this 2.5-Mb  
61 KRAB-ZFP gene cluster as an experimental model for megabase-scale genomic  
62 deletion in cultured cells and compared three methods employing the CRISPR/Cas9  
63 system: (1) non-homologous end joining (NHEJ), (2) homology-directed repair  
64 (HDR) using an ssODN donor, and (3) HDR using double-stranded targeting vectors.  
65 The results will serve as a benchmark for megabase-scale genomic deletion methods  
66 in cultured cells.

67

## 68 **RESULTS**

### 69 **Overview of the methods for deleting the 2.5-Mb genomic region**

70 Figure 1 shows the 2.5-Mb genomic region of the KRAB-ZFP gene cluster located on  
71 the distal side of mouse chromosome 4. We attempted to delete this entire region in  
72 mouse embryonic stem cells (ESCs) by cleaving the upstream and downstream sites  
73 with single guide RNAs (sgRNAs).

74 We compared three methods (Fig. 2A). In all methods, the plasmid vector  
75 pX330 (Cong *et al*, 2013) was used to express Cas9 and sgRNAs, and the TransFast  
76 transfection reagent, which employs lipid-mediated gene transfer, was utilized to  
77 introduce DNA into ESCs. In Method 1, repair template DNA was not transfected.  
78 Therefore, cleaved sites were repaired by NHEJ. In Method 2, a 146-base ssODN  
79 containing 70-base 5' and 3' homology arms (Fig. 2B) was co-transfected as a repair  
80 template for HDR. We introduced an EcoRI site between the homology arms (Fig. 2B)  
81 to facilitate the identification of HDR events. It was expected that NHEJ would still be  
82 observed in Method 2 in case the ssODN was not utilized during repair. To enrich  
83 transfected ESCs, we co-transfected a puromycin resistance gene expression vector in  
84 Methods 1 and 2 (Fig. 2A) and selected ESCs using puromycin between 24 h and 72 h  
85 after transfection (Fig. 2C, left). The ESCs were then sparsely plated on mitomycin  
86 C-treated mouse embryonic fibroblast (MEF) feeder cells. After 8 days of culture,  
87 colonies were picked and analyzed by polymerase chain reaction (PCR) (Fig. 2C, left).  
88 In Method 3, we transfected two double-stranded targeting vectors together with the  
89 Cas9/sgRNA expression vector (Fig. 2A, 2B). Each targeting vector contained the  
90 hygromycin resistance (*hyg*) gene and the neomycin resistance (*neo*) gene,  
91 respectively. Both vectors contained the same 1-kb homology arms corresponding to  
92 the upstream and downstream regions of the genomic cleavage sites. We expected that

93 co-transfection of two targeting vectors and selection for hygromycin/G418  
94 double-resistance would increase the efficiency of identifying biallelic deletions. One  
95 day after transfection, ESCs were split and selected with both hygromycin and G418,  
96 hygromycin only, and G418 only (Fig. 2C, right). Nine days after selection,  
97 drug-resistant colonies were picked and analyzed by PCR.

98

### 99 **Comparison of genomic deletions with and without the ssODN**

100 We compared Method 1, in which no repair template was introduced, and Method 2,  
101 in which an ssODN was introduced as a repair template. Single-cell-derived colonies  
102 were isolated according to the protocol in Figure 2C, and genomic deletions were  
103 detected by PCR as shown in Figure 3A. Both HDR and NHEJ were expected to  
104 occur in Method 2. We distinguished them by digesting the PCR products with EcoRI  
105 (Fig. 3A, right).

106 In both Method 1 and Method 2, four out of 46 colonies (9%) were  
107 PCR-positive (Fig. 3B, C). In Method 1, two bands of similar size were observed in  
108 one lane (A40 in Fig. 3B). To exclude the possibility that two clones were fused  
109 during ESC colony formation, PCR was conducted after recloning (Fig. 3D). However,  
110 the two bands were observed even after recloning. Therefore, we concluded that these  
111 two bands derive from a single clone. Their presence suggests the possibility that  
112 deletions occurred in both alleles. We address this point later in Figure 5.

113 To compare the efficiency of HDR and NHEJ in Method 2, the four PCR  
114 products obtained in Figure 3C were digested by EcoRI. EcoRI cleavage was  
115 observed in two of the products (Fig. 3E), indicating that the efficiency of HDR and

116 NHEJ was comparable. To further assess this observation, we purified genomic DNA  
117 from the bulk cell population (Fig. 2C), conducted PCR to amplify deletion junctions,  
118 and digested the PCR products with EcoRI (Fig. 3E). As expected, the PCR product  
119 obtained by Method 1 was not cleaved by EcoRI. On the other hand, EcoRI-cleaved  
120 bands were observed in the products derived by Method 2, and the density of cleaved  
121 and uncleaved bands was similar. Thus, as in the analysis of cloned cells, the  
122 efficiency of HDR and NHEJ was considered comparable.

123 To confirm that the PCR amplification represented the deletion of the targeted  
124 gene cluster, we sequenced the PCR products (Fig. 3F). Two clones derived by both  
125 Method 1 and Method 2 were analyzed, and the results confirmed that all PCR  
126 products represented the deletion of the targeted gene cluster. Both PCR products  
127 from Method 2 were cleaved with EcoRI (Fig. 3E), suggesting that the deletion was  
128 completed in a precise manner. However, sequence analysis revealed that one of the  
129 PCR products had a single base deletion of a guanine nucleotide upstream of the  
130 EcoRI site (B34 in Fig. 3F). Since oligonucleotide synthesis is not perfectly accurate,  
131 we speculate that this deletion may have been pre-existing in the ssODN.

132

### 133 **Genomic deletions using targeting vectors**

134 Next, we attempted genomic deletion by Method 3, which involves the transfection of  
135 hyg- and neo-targeting vectors for HDR. Following transfection, ESCs were selected  
136 with both hygromycin and G418, hygromycin only, or G418 only (Fig. 2C).  
137 Drug-resistant clones were analyzed by PCR using two primer pairs that detect HDR  
138 in the upstream and downstream regions (Fig. 4A).

139 First, we analyzed hygromycin-resistant clones. Out of the 19 clones analyzed,  
140 the expected recombination was observed in both upstream and downstream regions  
141 in 12 clones (63%; Fig. 4B). Next, we analyzed 13 G418-resistant clones and  
142 observed the expected recombination in both upstream and downstream regions in 4  
143 clones (31%; Fig. 4C). Thus, the mean deletion efficiency of HDR using targeting  
144 vectors was 47%, which is 5 times higher than that of NHEJ or ssODN-mediated  
145 HDR. Finally, we analyzed hygromycin/G418 double-resistant clones to investigate  
146 whether they harbor a biallelic mutation. We obtained much fewer colonies via  
147 hygromycin/G418 double-selection compared to the single selections. We analyzed 3  
148 double-resistant clones by PCR using 4 primer sets for each clone; however, the  
149 expected recombination was not observed with at least one of the primer sets (Fig.  
150 4D), suggesting that biallelic deletion is not a frequent event.

151

### 152 **Comparison of biallelic deletion frequency between the three methods**

153 To analyze the phenotypes caused by genomic deletions, it is often necessary to  
154 introduce deletions in both alleles. However, the results of the analysis of  
155 hygromycin/G418 double-resistant clones suggested that biallelic deletion is not  
156 frequent (Fig. 4D). Therefore, we systematically compared the frequency of biallelic  
157 deletion among the three methods by analyzing the PCR-positive clones shown in  
158 Figures 3 and 4.

159 We set up two pairs of PCR primers within the deleted region (Fig. 5A). If both  
160 alleles were deleted, no amplification should be detected. For Method 1 and 2, we  
161 analyzed all clones that showed deletion in Figure 3. PCR amplification was observed

162 in all clones (Fig. 5B), suggesting that biallelic deletion did not occur. This includes  
163 the clone A40, which showed two bands in Figures 3B and 3D. The clone A40 could  
164 be aneuploid and have, for example, three copies of chromosome 4, two having  
165 undergone deletion and one being retained intact. For Method 3, we analyzed 12  
166 hygromycin-resistant clones in which the predicted recombination was observed in  
167 both upstream and downstream regions (Fig. 4B). No amplification was observed in  
168 three clones (H4, H11, H19; Fig. 5C), suggesting that both alleles were deleted in  
169 these clones. To investigate whether biallelic deletion accompanied NHEJ, which does  
170 not involve the recombination of the targeting vector as observed in Method 1, we  
171 conducted the same PCR analysis performed in Figure 3B. No amplification was  
172 detected (Fig. 5D), suggesting that either the NHEJ observed in Method 1 did not  
173 occur or that NHEJ with the deletion of the binding site of the PCR primer occurred.  
174 To examine the possibility that biallelic deletion involved HDR by the neo-targeting  
175 vector, we conducted the same PCR analysis shown in Figure 4C. No amplification  
176 was detected in two of the three biallelic mutants (Fig. 5E). Although PCR  
177 amplification was detected in one of the mutants in the analysis of the upstream region  
178 (clone H11), the band size was different from the expected one and no amplification  
179 was detected in the downstream region (Fig. 5E), suggesting that HDR by the  
180 neo-targeting vector did not occur. On the basis of the results of Figures 5D and 5E,  
181 we speculate that biallelic deletion was introduced through biallelic HDR by the  
182 hyg-targeting vector or through the combination of single allele HDR by the  
183 hyg-targeting vector and NHEJ accompanied by the deletion of the PCR primer  
184 binding site.



185

## 186 **RNA-seq analysis of deletion mutants**

187       Although the absence of PCR amplification within the deletion target site  
188 supports biallelic deletion in the three clones H4, H11, and H19 (Fig. 5C), we could  
189 not clarify the deletion junction by PCR analysis (Fig. 5D, E). To determine whether  
190 the biallelic deletion was confined to the expected region, we performed RNA-seq in  
191 the following four cell lines—wild-type ESCs, the clone H14 with single-allele  
192 deletion, and the clones H4 and H19 with biallelic deletion— and compared the gene  
193 expression at the deletion target site (Fig. 6, Supplementary Table 1). In the  
194 single-allele deletion clone (H14), the expression of the gene cluster within the  
195 deletion target site was reduced by approximately two fold compared with wild-type  
196 ESCs, as predicted (Fig. 6A, left). By contrast, in the biallelic deletion clones (H4 and  
197 H19), the expression of the gene cluster was almost undetectable (Fig. 6A, middle and  
198 right), confirming the biallelic deletion of the 2.5-Mb gene cluster. We then analyzed  
199 the gene expression around the upstream (Fig. 6B) and the downstream (Fig. 6C)  
200 deletion junctions. The gene expression was detectable outside the deletion target site  
201 in both biallelic mutants (Fig. 6B, C), indicating that the deletion was confined to the  
202 expected region. These results demonstrate that the biallelic deletion of the 2.5-Mb  
203 gene cluster was achieved using the targeting vectors.

204

## 205 **DISCUSSION**

206 In this study, we compared three megabase-scale genomic deletion methods in mouse  
207 ESCs: Method 1 using Cas9/sgRNA only, Method 2 using Cas9/sgRNA and ssODN,

208 and Method 3 using Cas9/sgRNA and targeting vectors. The results showed that all  
209 methods are feasible at least for monoallelic deletion. On the other hand, the three  
210 methods differed in the simplicity of the experimental design and the efficiency of  
211 deletion. Therefore, the choice of method depends on the purpose of the experiment.  
212 In the following section, we compare the three methods and discuss some  
213 considerations to further improve deletion efficiency.

214 The deletion efficiency in Methods 1, 2, and 3 were 9%, 9%, and 31–63%,  
215 respectively. Furthermore, biallelic deletion was observed only in Method 3. This  
216 indicates that Method 3, which uses a targeting vector, is superior to the others when  
217 considering only the efficiency of deletion. However, there are some drawbacks to  
218 using targeting vectors. First, generating a targeting vector is time-consuming. Second,  
219 setting up experimental conditions for PCR screening of the deletion clones may take  
220 time compared to Methods 1 and 2 because a longer PCR amplification is required.  
221 Therefore, Methods 1 and 2, which are straightforward in their experimental design,  
222 may be sufficiently effective if the number of clones to be screened by PCR is  
223 manageable. In fact, a recent report demonstrated biallelic deletion of the same  
224 KRAB-ZFP gene cluster by a procedure similar to Method 2 (Wolf *et al.*, 2020).  
225 Although the efficiency of biallelic deletion is not described in this report, the results  
226 suggest that sufficient deletion efficiency may be achieved without using a targeting  
227 vector by optimizing experimental conditions.

228 Several possible improvements can be made to increase the efficiency of  
229 megabase-scale genomic deletion. The first is to use a ribonucleoprotein (RNP)  
230 complex consisting of Cas9 and sgRNA. A recent report demonstrated that

231 transfection of a Cas9/sgRNA RNP complex was more efficient in cleaving the  
232 genome than transfection of Cas9/sgRNA expression vectors. The authors argue that  
233 the intracellular assembly of Cas9 and sgRNAs expressed from transfected vectors is  
234 hampered by the competitive binding of mRNA to Cas9 (Kagita *et al.*, 2021). Second,  
235 optimization of transfection conditions may significantly affect the deletion efficiency.  
236 In the same report described above, two electroporators, MaxCyte and  
237 4D-Nucleofector, were compared for the introduction of mutations into human iPSCs  
238 by ssODNs (Kagita *et al.*, 2021). The results showed that MaxCyte was superior to  
239 4D-Nucleofector in terms of mutagenesis efficiency. In our study, cationic lipid-based  
240 transfection reagents were used. The use of other transfection methods may improve  
241 the efficiency of megabase-scale genomic deletions. Third, the use of single-stranded  
242 targeting vectors may be useful. Previous studies in zygote microinjection have  
243 suggested that long single-stranded DNA donors are efficient templates for HDR  
244 (Codner *et al.*, 2018; Miura *et al.*, 2015; Quadros *et al.*, 2017). However, targeting  
245 vectors used in cultured cells are usually several kb in length because of the presence  
246 of a selection marker cassette, and the preparation of such a long single-stranded DNA  
247 of high quality is labor-intensive. Recently, it has become possible to synthesize long  
248 single-stranded DNA commercially, which may apply to megabase-scale deletion.

249 Taken together, the results of this study will serve as a benchmark for selecting  
250 methods to introduce megabase-scale genomic deletions.

251

## 252 **METHODS**

### 253 **Cell line and cell culture**

254 The REC24-3 mouse ESC line, a derivative of the V6.5 mouse ESC line (Eggan *et al*,  
255 2001), was used in this study. REC24-3 contains the ERT2-iCre-ERT2 cassette  
256 (Casanova *et al*, 2002) at the Rosa26 locus (Zambrowicz *et al*, 1997), which was  
257 introduced by the same procedure described previously (Horie *et al*, 2011). The  
258 presence of the ERT2-iCre-ERT2 cassette is irrelevant to the purpose of this study.  
259 ESCs were cultured in a serum-containing medium composed of KnockOut DMEM  
260 (Thermo Fisher Scientific) supplemented with 20% fetal bovine serum (FBS),  
261 non-essential amino acids, 0.1 mM 2-mercaptoethanol and 1,000 U/ml leukemia  
262 inhibitory factor (LIF; Millipore). Mitomycin C (MMC)-treated MEFs were used as  
263 feeder cells.

264

### 265 **Construction of the Cas9/sgRNA expression vectors**

266 Cas9 and sgRNAs were expressed using pX330 (Cong *et al.*, 2013). Complementary  
267 oligonucleotides for each sgRNA (Supplementary Table 2) were annealed and cloned  
268 into the BbsI site of pX330.

269

### 270 **Construction of the targeting vectors**

271 The targeting vectors were constructed using the primers listed in Supplementary  
272 Table 2 as follows. A 1-kb genomic fragment upstream of the cleavage site of gRNA1  
273 was PCR-amplified from C57BL/6J genomic DNA using the primers  
274 Zfp600-5HR1-F1 and Zfp600-5HR1-R1. The fragment was digested with KpnI and  
275 HindIII and cloned into the KpnI-HindIII site of pPGKneo-F2F (gift from Dr. K.  
276 Yusa) adjacent to the neo selection cassette, resulting in pPGKneoF2F-Zfp600-5HR.

277 Next, a 1-kb genomic fragment downstream of the cleavage site of gRNA2 was  
278 PCR-amplified from C57BL/6J genomic DNA using primers Zfp600-3HR1-F1 and  
279 Zfp600-3HR1-R1. The fragment was digested with NotI and SacII and cloned into the  
280 NotI-SacII site of the pPGKneoF2F-Zfp600-5HR, which is located opposite to the  
281 first cloning site of the neo selection cassette, resulting in the neo-targeting vector  
282 pZfp600-DEL-TV1-Neo. The HindIII-NotI neo cassette of pZfp600-DEL-TV1 was  
283 replaced with the HindIII-NotI hyg cassette of pPGKhyg-F2F (gift from Dr. K. Yusa),  
284 resulting in the hyg-targeting vector pZfp600-DEL-TV1-Hyg.

285

## 286 **Transfection**

287 The TransFast transfection reagent (Promega) was used in all transfections. ESCs ( $2.5$   
288  $\times 10^5$ ) were mixed with 2.5  $\mu\text{g}$  of DNA and 15  $\mu\text{l}$  of TransFast in serum-containing  
289 medium in a total volume of 500  $\mu\text{l}$  and plated onto one well of a 24-well plate seeded  
290 with MMC-treated MEFs. After 1 h, 1 ml of medium was added to the well, and the  
291 medium was replaced with fresh medium 10 h after transfection. After this step,  
292 different culture protocols were utilized depending on the purpose of the experiment  
293 as described below.

294

## 295 **Comparison of the deletion protocols**

296 **Method 1:** On Day 0, ESCs ( $2.5 \times 10^5$ ) were transfected with 1.125  $\mu\text{g}$  of  
297 pX330-gRNA1, 1.125  $\mu\text{g}$  of pX330-gRNA2, and 0.25  $\mu\text{g}$  of the puromycin resistance  
298 gene expression vector (pPGKpuro). ESCs were selected by 1  $\mu\text{g}/\text{ml}$  of puromycin  
299 from Day 1 to Day 3 to enrich transfected cells. After completing puromycin selection

300 on Day 3, ESCs were dissociated with trypsin/EDTA and plated sparsely on MEFs  
301 without puromycin for single-cell cloning; the remaining cells were subjected to  
302 genomic DNA purification as a bulk control. On Day 11, ESC colonies were picked  
303 and divided into two groups: one for PCR analysis and the other for continuous  
304 culture to make frozen stocks.

305 **Method 2:** On Day 0, ESCs ( $2.5 \times 10^5$ ) were transfected with 0.75  $\mu\text{g}$  of  
306 pX330-gRNA1, 0.75  $\mu\text{g}$  of pX330-gRNA2, 0.75  $\mu\text{g}$  of ssODN, and 0.25  $\mu\text{g}$  of  
307 pPGKpuro. The remaining procedure is the same as in Method 1.

308 **Method 3:** On Day 0, ESCs ( $2.5 \times 10^5$ ) were transfected with 0.625  $\mu\text{g}$  of  
309 pX330-gRNA1, pX330-gRNA2, pZfp600-DEL-TV1-Hyg, and  
310 pZfp600-DEL-TV1-Neo. On Day 1, ESCs were dissociated with trypsin/EDTA,  
311 plated onto 6-cm dishes, and subjected to three different drug selections: G418 only,  
312 hygromycin only, and G418 plus hygromycin. On Day 9, ESC colonies were picked  
313 and divided into two groups: one for lysate preparation for PCR analysis of the  
314 deletion events and the other for cell culture to make frozen stocks.

315

### 316 **RNA-seq**

317 The total RNA was extracted with RNeasy Plus Mini Kit (Qiagen). MEF feeder cells  
318 were removed from ESC culture before RNA extraction by plating cells on a  
319 gelatin-coated dish for 30 min during the passaging and expanding unattached cells in  
320 a new dish. Library preparation was performed using the TruSeq stranded mRNA  
321 sample prep kit (Illumina) according to the manufacturer's instructions. Sequencing  
322 was performed on the Illumina NovaSeq 6000 platform in a 100 bp paired-end mode.

323 Sequenced reads were mapped to the mouse reference genome sequences (mm10)  
324 using TopHat v2.0.13 (Trapnell *et al*, 2009) in combination with Bowtie2 ver. 2.2.3  
325 (Langmead & Salzberg, 2012) and SAMtools ver. 0.1.19 (Li *et al*, 2009). The  
326 fragments per kilobase of exon per million mapped fragments (FPKM) was  
327 calculated using Cufflinks version 2.2.1 (Trapnell *et al*, 2010) (Supplementary Table  
328 1).

329

### 330 **Data availability**

331 The RNA-seq data are available in the DNA Data Bank of Japan (DDBJ) Sequencing  
332 Read Archive under the accession numbers DRA013360.

333

334 **AUTHOR CONTRIBUTIONS**

335 Conceptualization, K.H.; Methodology, K.H.; Investigation, M.M., J.Y., I.T., K.H.;

336 Writing the original draft, K.H., M.M.; Resources, K.H.; Supervision, K.H.; Project

337 administration, K.H.; Funding acquisition, K.H.

338

339 **ACKNOWLEDGMENTS**

340 We acknowledge the NGS core facility of the Genome Information Research Center at

341 the Research Institute for Microbial Diseases of Osaka University for support with

342 RNA sequencing and data analysis. We thank Dr. Kosuke Yusa for providing the

343 plasmids pPGKneo-F2F and pPGKhyg-F2F. This work was supported by

344 Grants-in-Aid for Scientific Research from the Ministry of Education, Culture, Sports,

345 Science, and Technology of Japan (JP16H04683, JP18K19275, JP20H03174 for K.H.).

346 This work was also supported in part by Nara Medical University Grant-in-Aid for

347 Collaborative Research Projects and a research grant from the Takeda Science

348 Foundation (K.H.), Naito Foundation (K.H.), and Daiichi Sankyo Foundation of Life

349 Science (K.H.).

350

351 **FIGURE LEGENDS**

352 **Figure 1. Genomic view of the KRAB-ZFP gene cluster on chromosome 4.**

353 UCSC genome browser view of the KRAB-ZFP gene cluster and the position of the

354 sgRNAs used for genomic deletion.

355

356 **Figure 2. Protocols for inducing genomic deletion.**



357 (A) Summary of the three methods compared in this study. (B) Schematic of the  
358 vector structures. U6, U6 promoter; CBh, truncated CBA hybrid promoter; PGK,  
359 phosphoglycerate kinase-1 promoter; pA, polyadenylation signal. (C, D) Time course  
360 of Methods 1, 2, and 3.

361

### 362 **Figure 3. Genomic deletion induced by Method 1 and Method 2.**

363 (A) Predicted scheme of genomic deletions induced by NHEJ (left) and  
364 ssODN-mediated HDR (right). (B, C) PCR screening of genomic deletions in Method  
365 1 (B) and Method 2 (C). A magnified view of clone A40 is shown to depict the two  
366 bands that are close in size. M, 100-bp size marker. (D) Schematic diagram showing  
367 the procedure for subcloning A40 and the result of the PCR analysis. (E) EcoRI  
368 digestion of PCR products obtained in Method 2. (F) Representative results of the  
369 sequence analysis of the PCR products obtained in Method 1 (left) and Method 2  
370 (right). Dashed lines indicate nucleotide deletions from the Cas9/sgRNA-mediated  
371 cleavage site.

372

### 373 **Figure 4. Genomic deletion induced by Method 3.**

374 (A) Predicted scheme of genomic deletions induced by HDR following transfection of  
375 targeting vectors. Two targeting vectors, each containing the hyg and the neo cassette,  
376 were co-transfected. (B-D) PCR screening of genomic deletions in  
377 hygromycin-resistant clones (B), G418-resistant clones (C), and hygromycin/G418  
378 double-resistant clones (D). M, 1-kb size marker.

379

380 **Figure 5. Identification of biallelic deletion events.**

381 (A) Location of the PCR primers for the screening of biallelic deletion. (B, C) PCR  
382 screening for biallelic deletion of the candidate clones obtained by Method 1 and  
383 Method 2 (B) and Method 3 (C). (D) Screening for NHEJ-mediated genomic deletion.  
384 The same PCR protocol as in Figure 3B was performed. Clone A20, which was  
385 PCR-positive in Figure 3B, was used as a positive control as indicated (Pos cnt). (E)  
386 Screening for HDR mediated by the neo-targeting vector. The same PCR protocol as  
387 in Figure 4C was performed. Clone G2, which was PCR-positive in Figure 4C, was  
388 used as a positive control (Pos cnt).

389

390 **Figure 6. RNA-seq analysis of deletion mutants.**

391 (A) Expression analysis of the KRAB-ZFP gene cluster. The gene expressions of the  
392 single-allele deletion mutant (H14) and biallelic deletion mutants (H4 and H19) were  
393 compared with wild-type ESCs (Wt). Red dots indicate the expression of the  
394 KRAB-ZFP gene cluster under study. Data are shown in FPKM. (B, C) Gene  
395 expression at the upstream (B) and downstream (C) deletion junctions. Note that the  
396 gene expression outside the deletion target site was detectable in both biallelic  
397 deletion mutants (H4 and H19), indicating that biallelic deletion was confined to the  
398 predicted region.

399

400 **References**

- 401 Boroviak K, Doe B, Banerjee R, Yang F, Bradley A (2016) Chromosome engineering in  
402 zygotes with CRISPR/Cas9. *Genesis* 54: 78-85
- 403 Casanova E, Fehsenfeld S, Lemberger T, Shimshek DR, Sprengel R, Mantamadiotis T (2002)  
404 ER-based double iCre fusion protein allows partial recombination in forebrain. *Genesis* 34:

405 208-214

406 Codner GF, Mianne J, Caulder A, Loeffler J, Fell R, King R, Allan AJ, Mackenzie M, Pike FJ,  
407 McCabe CV *et al* (2018) Application of long single-stranded DNA donors in genome editing:  
408 generation and validation of mouse mutants. *BMC biology* 16: 70

409 Cong L, Ran FA, Cox D, Lin S, Barretto R, Habib N, Hsu PD, Wu X, Jiang W, Marraffini LA  
410 *et al* (2013) Multiplex genome engineering using CRISPR/Cas systems. *Science (New York,*  
411 *NY)* 339: 819-823

412 Ecco G, Imbeault M, Trono D (2017) KRAB zinc finger proteins. *Development* 144:  
413 2719-2729

414 Eggan K, Akutsu H, Loring J, Jackson-Grusby L, Klemm M, Rideout WM, 3rd, Yanagimachi  
415 R, Jaenisch R (2001) Hybrid vigor, fetal overgrowth, and viability of mice derived by nuclear  
416 cloning and tetraploid embryo complementation. *Proc Natl Acad Sci U S A* 98: 6209-6214

417 Eleveld TF, Bakali C, Eijk PP, Stathi P, Vriend LE, Poddighe PJ, Ylstra B (2021) Engineering  
418 large-scale chromosomal deletions by CRISPR-Cas9. *Nucleic Acids Res* 49: 12007-12016

419 Essletzbichler P, Konopka T, Santoro F, Chen D, Gapp BV, Kralovics R, Brummelkamp TR,  
420 Nijman SM, Burckstummer T (2014) Megabase-scale deletion using CRISPR/Cas9 to  
421 generate a fully haploid human cell line. *Genome Res* 24: 2059-2065

422 Hnisz D, Day DS, Young RA (2016) Insulated Neighborhoods: Structural and Functional  
423 Units of Mammalian Gene Control. *Cell* 167: 1188-1200

424 Horie K, Kokubu C, Yoshida J, Akagi K, Isotani A, Oshitani A, Yusa K, Ikeda R, Huang Y,  
425 Bradley A *et al* (2011) A homozygous mutant embryonic stem cell bank applicable for  
426 phenotype-driven genetic screening. *Nat Methods* 8: 1071-1077

427 Kagita A, Lung MSY, Xu H, Kita Y, Sasakawa N, Iguchi T, Ono M, Wang XH, Gee P, Hotta  
428 A (2021) Efficient ssODN-Mediated Targeting by Avoiding Cellular Inhibitory RNAs  
429 through Precomplexed CRISPR-Cas9/sgRNA Ribonucleoprotein. *Stem Cell Reports* 16:  
430 985-996

431 Kato T, Hara S, Goto Y, Ogawa Y, Okayasu H, Kubota S, Tamano M, Terao M, Takada S  
432 (2017) Creation of mutant mice with megabase-sized deletions containing custom-designed  
433 breakpoints by means of the CRISPR/Cas9 system. *Sci Rep* 7: 59

434 Korablev AN, Serova IA, Serov OL (2017) Generation of megabase-scale deletions,  
435 inversions and duplications involving the Contactin-6 gene in mice by CRISPR/Cas9  
436 technology. *BMC Genet* 18: 112

437 Langmead B, Salzberg SL (2012) Fast gapped-read alignment with Bowtie 2. *Nat Methods* 9:  
438 357-359

439 Li H, Handsaker B, Wysoker A, Fennell T, Ruan J, Homer N, Marth G, Abecasis G, Durbin R  
440 (2009) The Sequence Alignment/Map format and SAMtools. *Bioinformatics (Oxford,*  
441 *England)* 25: 2078-2079

442 Merkschlager M, Nora EP (2016) CTCF and Cohesin in Genome Folding and

- 443 Transcriptional Gene Regulation. *Annu Rev Genomics Hum Genet* 17: 17-43
- 444 Miura H, Gurumurthy CB, Sato T, Sato M, Ohtsuka M (2015) CRISPR/Cas9-based  
445 generation of knockdown mice by intronic insertion of artificial microRNA using longer  
446 single-stranded DNA. *Sci Rep* 5: 12799
- 447 Mizuno S, Takami K, Daitoku Y, Tanimoto Y, Dinh TT, Mizuno-Iijima S, Hasegawa Y,  
448 Takahashi S, Sugiyama F, Yagami K (2015) Peri-implantation lethality in mice carrying  
449 megabase-scale deletion on 5qc3.3 is caused by Exoc1 null mutation. *Sci Rep* 5: 13632
- 450 Quadros RM, Miura H, Harms DW, Akatsuka H, Sato T, Aida T, Redder R, Richardson GP,  
451 Inagaki Y, Sakai D *et al* (2017) Easi-CRISPR: a robust method for one-step generation of  
452 mice carrying conditional and insertion alleles using long ssDNA donors and CRISPR  
453 ribonucleoproteins. *Genome Biol* 18: 92
- 454 Trapnell C, Pachter L, Salzberg SL (2009) TopHat: discovering splice junctions with  
455 RNA-Seq. *Bioinformatics (Oxford, England)* 25: 1105-1111
- 456 Trapnell C, Williams BA, Pertea G, Mortazavi A, Kwan G, van Baren MJ, Salzberg SL, Wold  
457 BJ, Pachter L (2010) Transcript assembly and quantification by RNA-Seq reveals  
458 unannotated transcripts and isoform switching during cell differentiation. *Nat Biotechnol* 28:  
459 511-515
- 460 Wolf G, de Iaco A, Sun MA, Bruno M, Tinkham M, Hoang D, Mitra A, Ralls S, Trono D,  
461 Macfarlan TS (2020) KRAB-zinc finger protein gene expansion in response to active  
462 retrotransposons in the murine lineage. *Elife* 9: e56337
- 463 Zambrowicz BP, Imamoto A, Fiering S, Herzenberg LA, Kerr WG, Soriano P (1997)  
464 Disruption of overlapping transcripts in the ROSA bgeo 26 gene trap strain leads to  
465 widespread expression of b-galactosidase in mouse embryos and hematopoietic cells. *Proc*  
466 *Natl Acad Sci U S A* 94: 3789-3794
- 467

## Chromosome 4/KRAB-ZFP locus

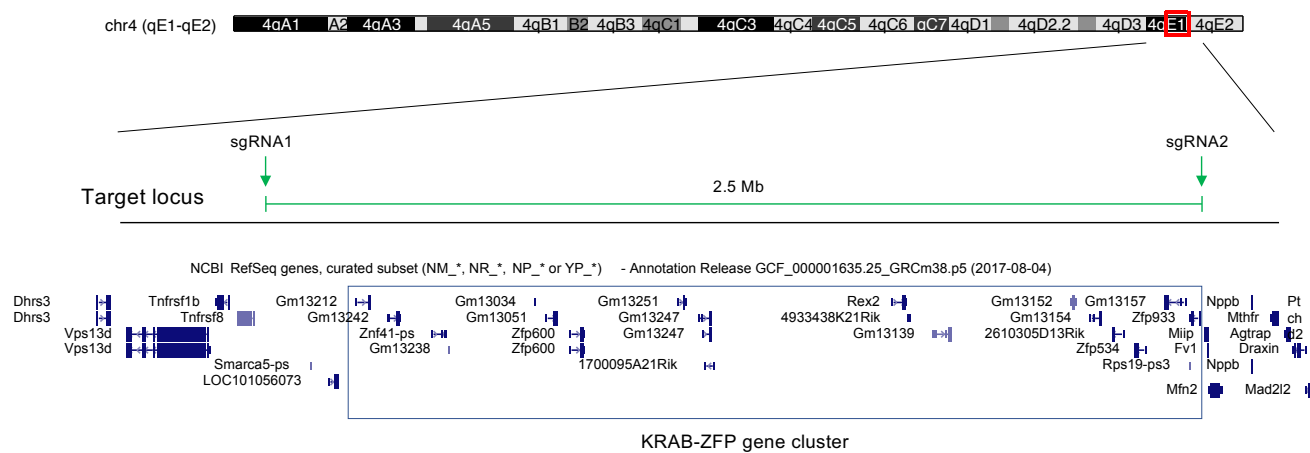

Fig. 1

**A**

| Method | Transfection                   | Repair pathway |
|--------|--------------------------------|----------------|
| 1      | Cas9/sgRNA + pPGKpuro          | NHEJ           |
| 2      | Cas9/sgRNA + ssODN + pPGKpuro  | HDR            |
| 3      | Cas9/sgRNA + targeting vectors | HDR            |

**B**

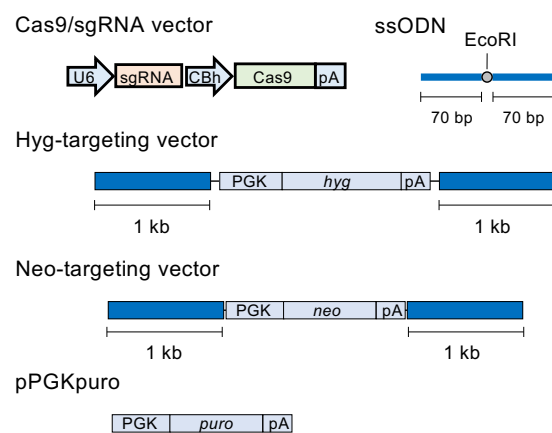

**C**

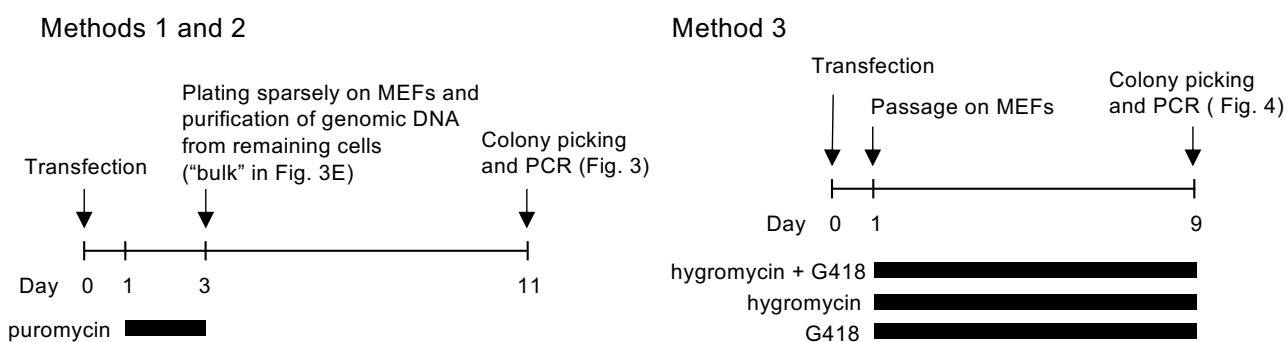

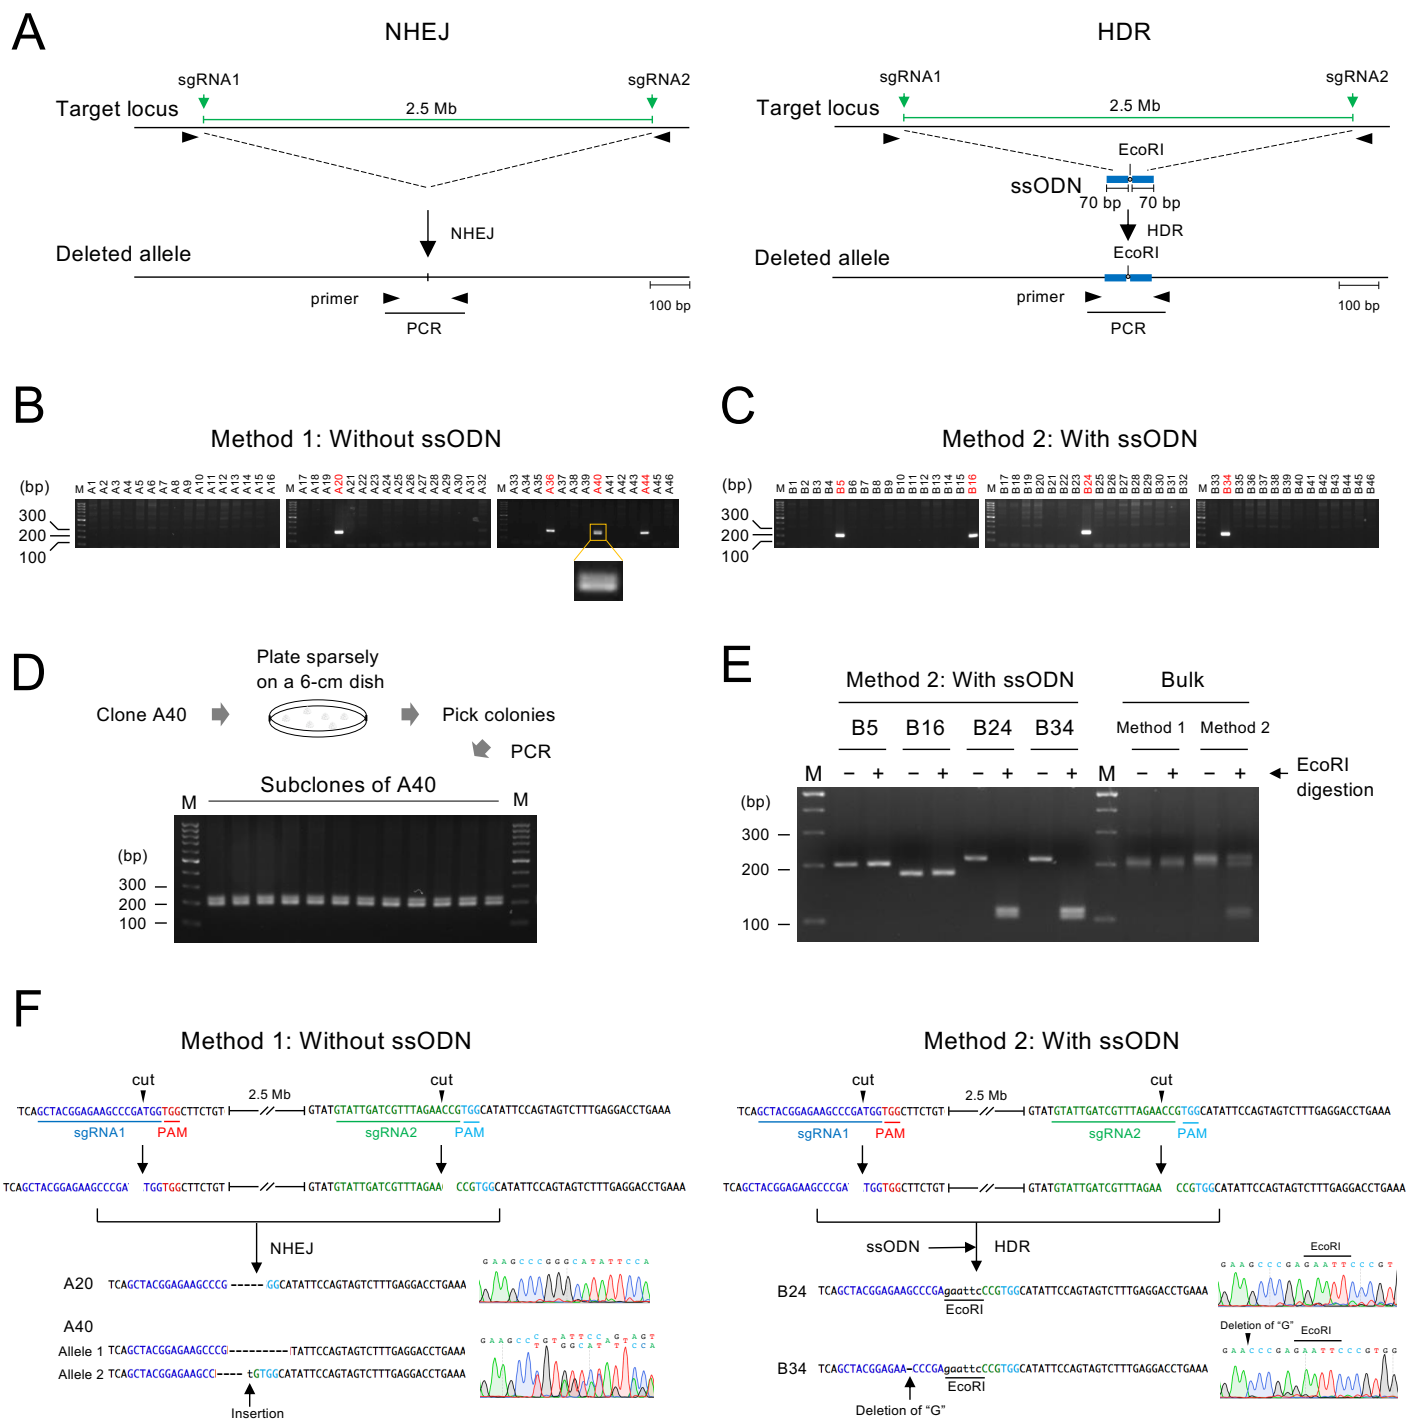

Fig. 3

**A**

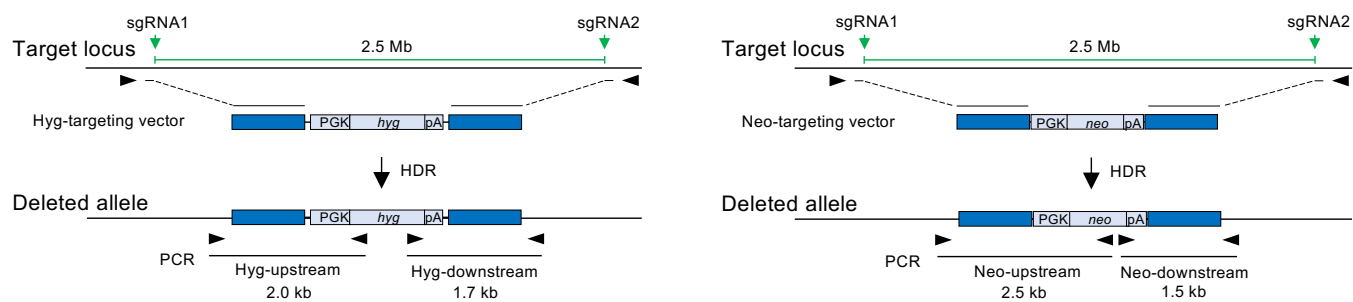

**B**

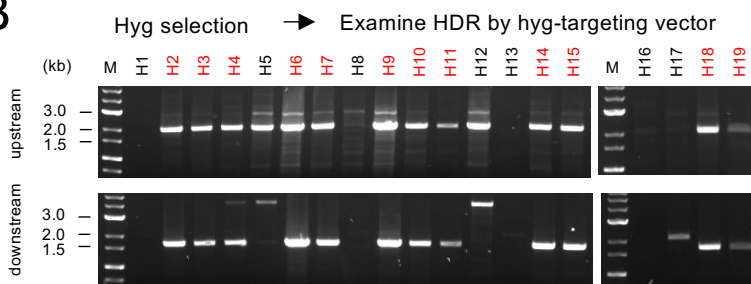

**C**

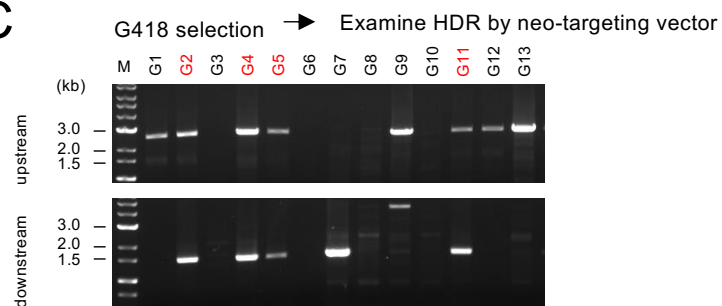

**D**

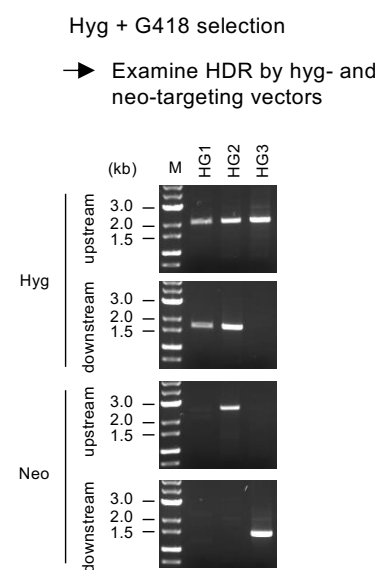



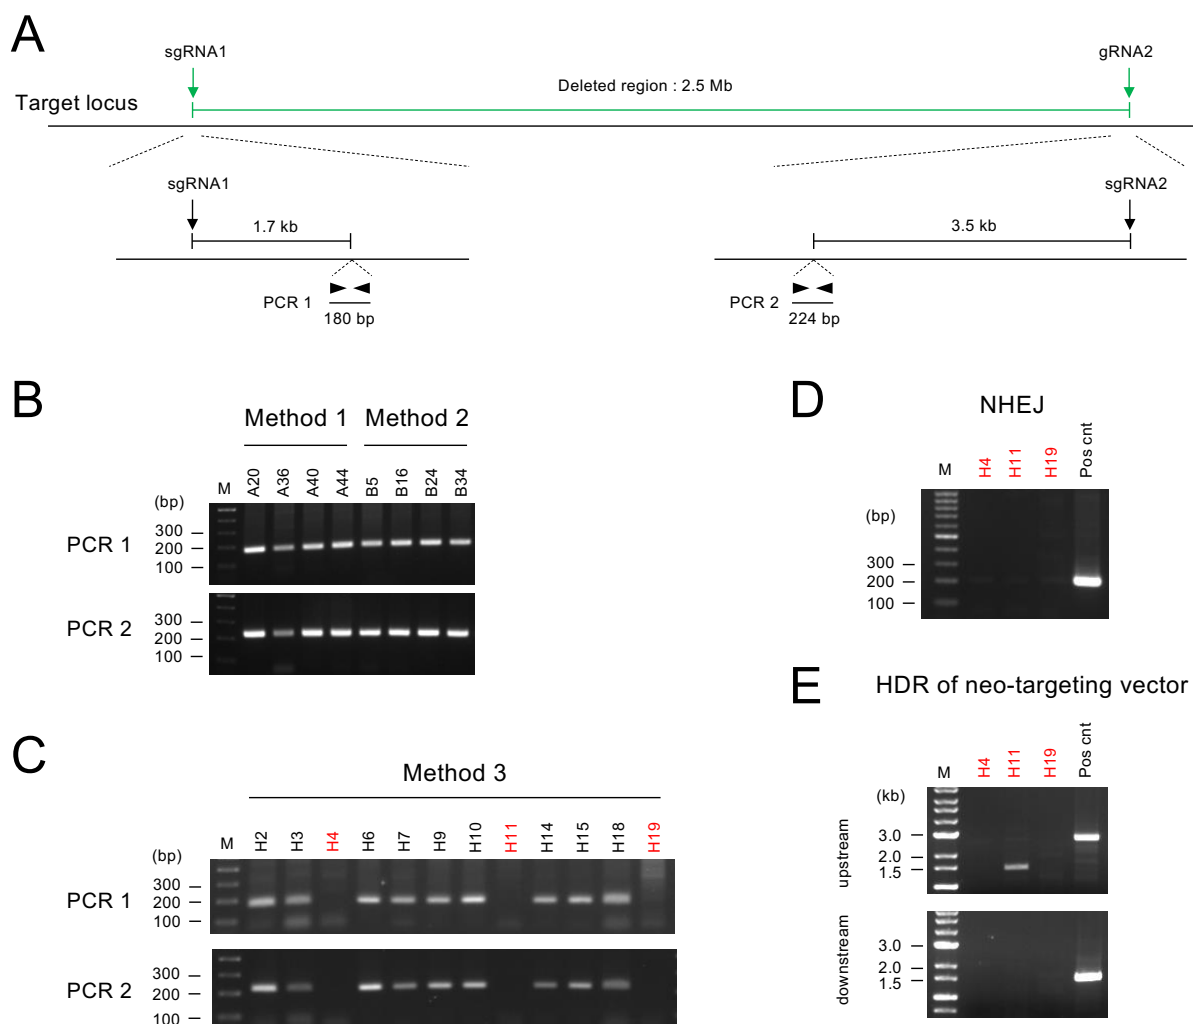

Fig. 5

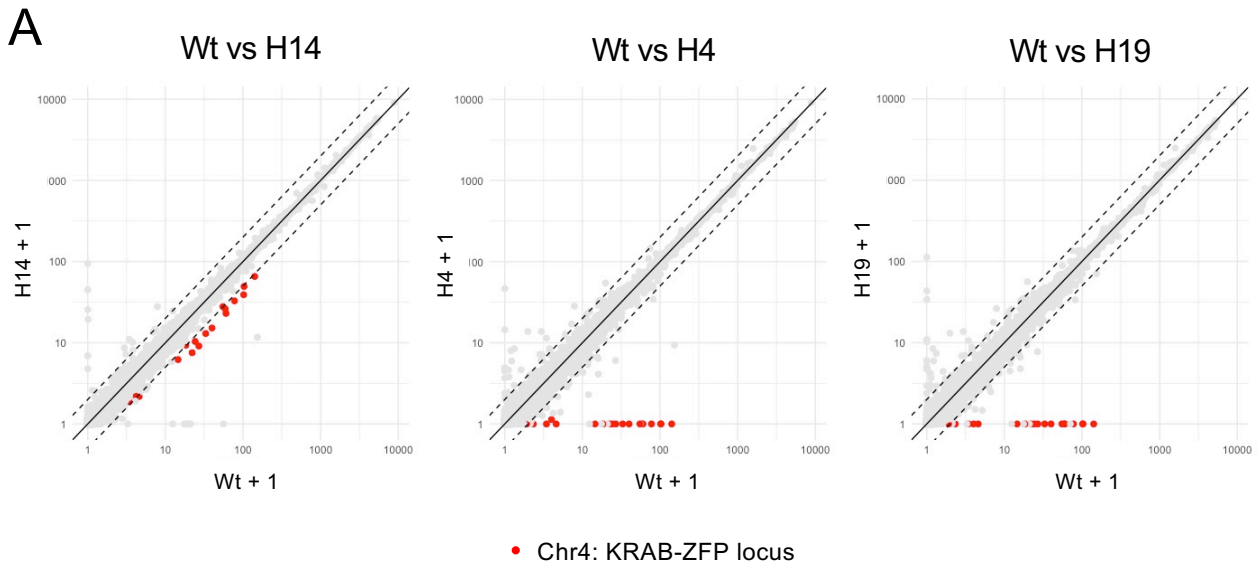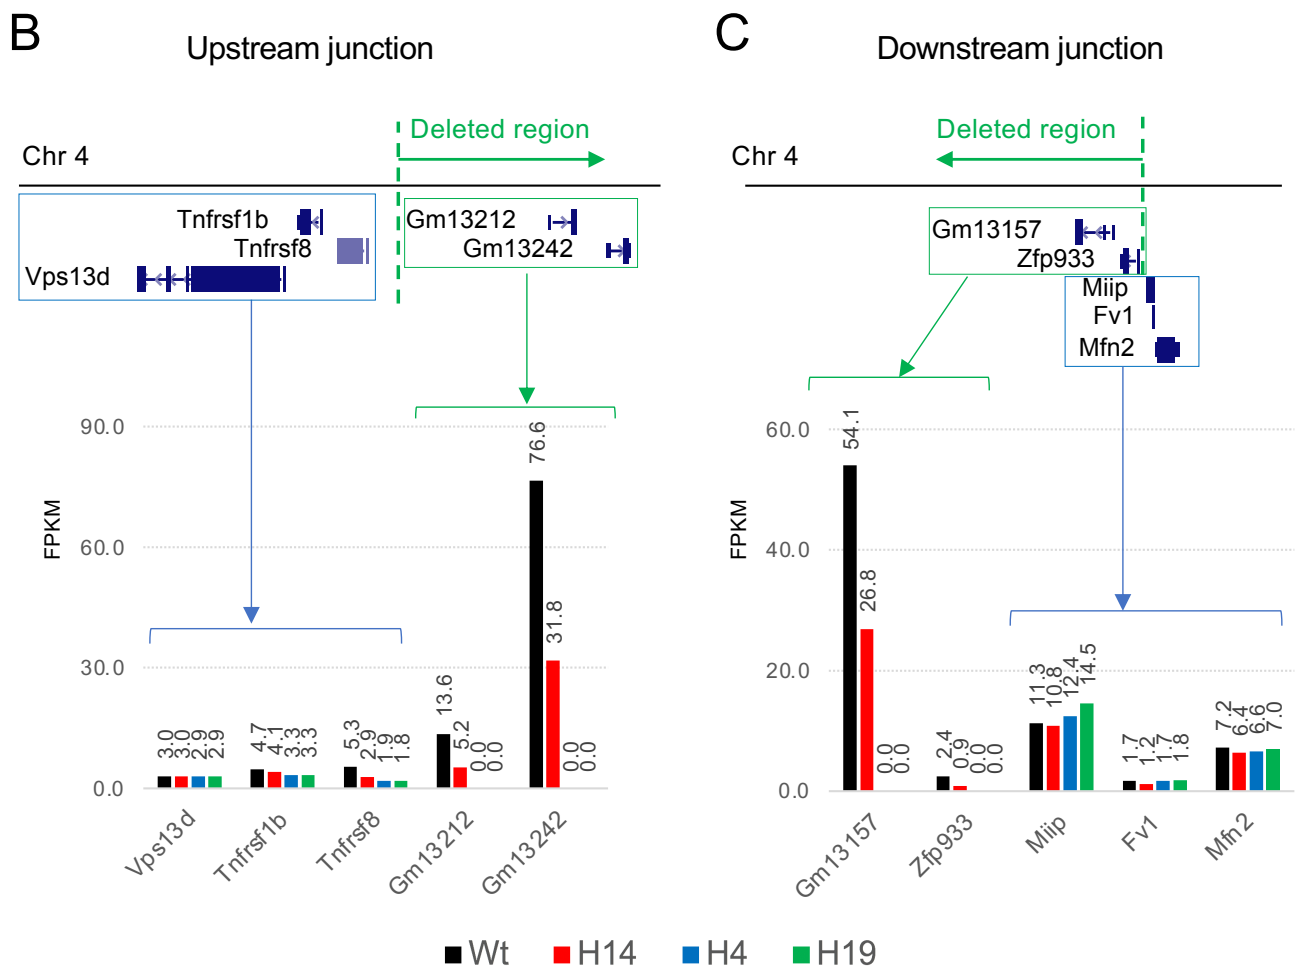

Fig. 6
